# Supplementary material
Source: Royal Society of Chemistry journal article supplement (doi:10.1039/d6se00122j)

**a**

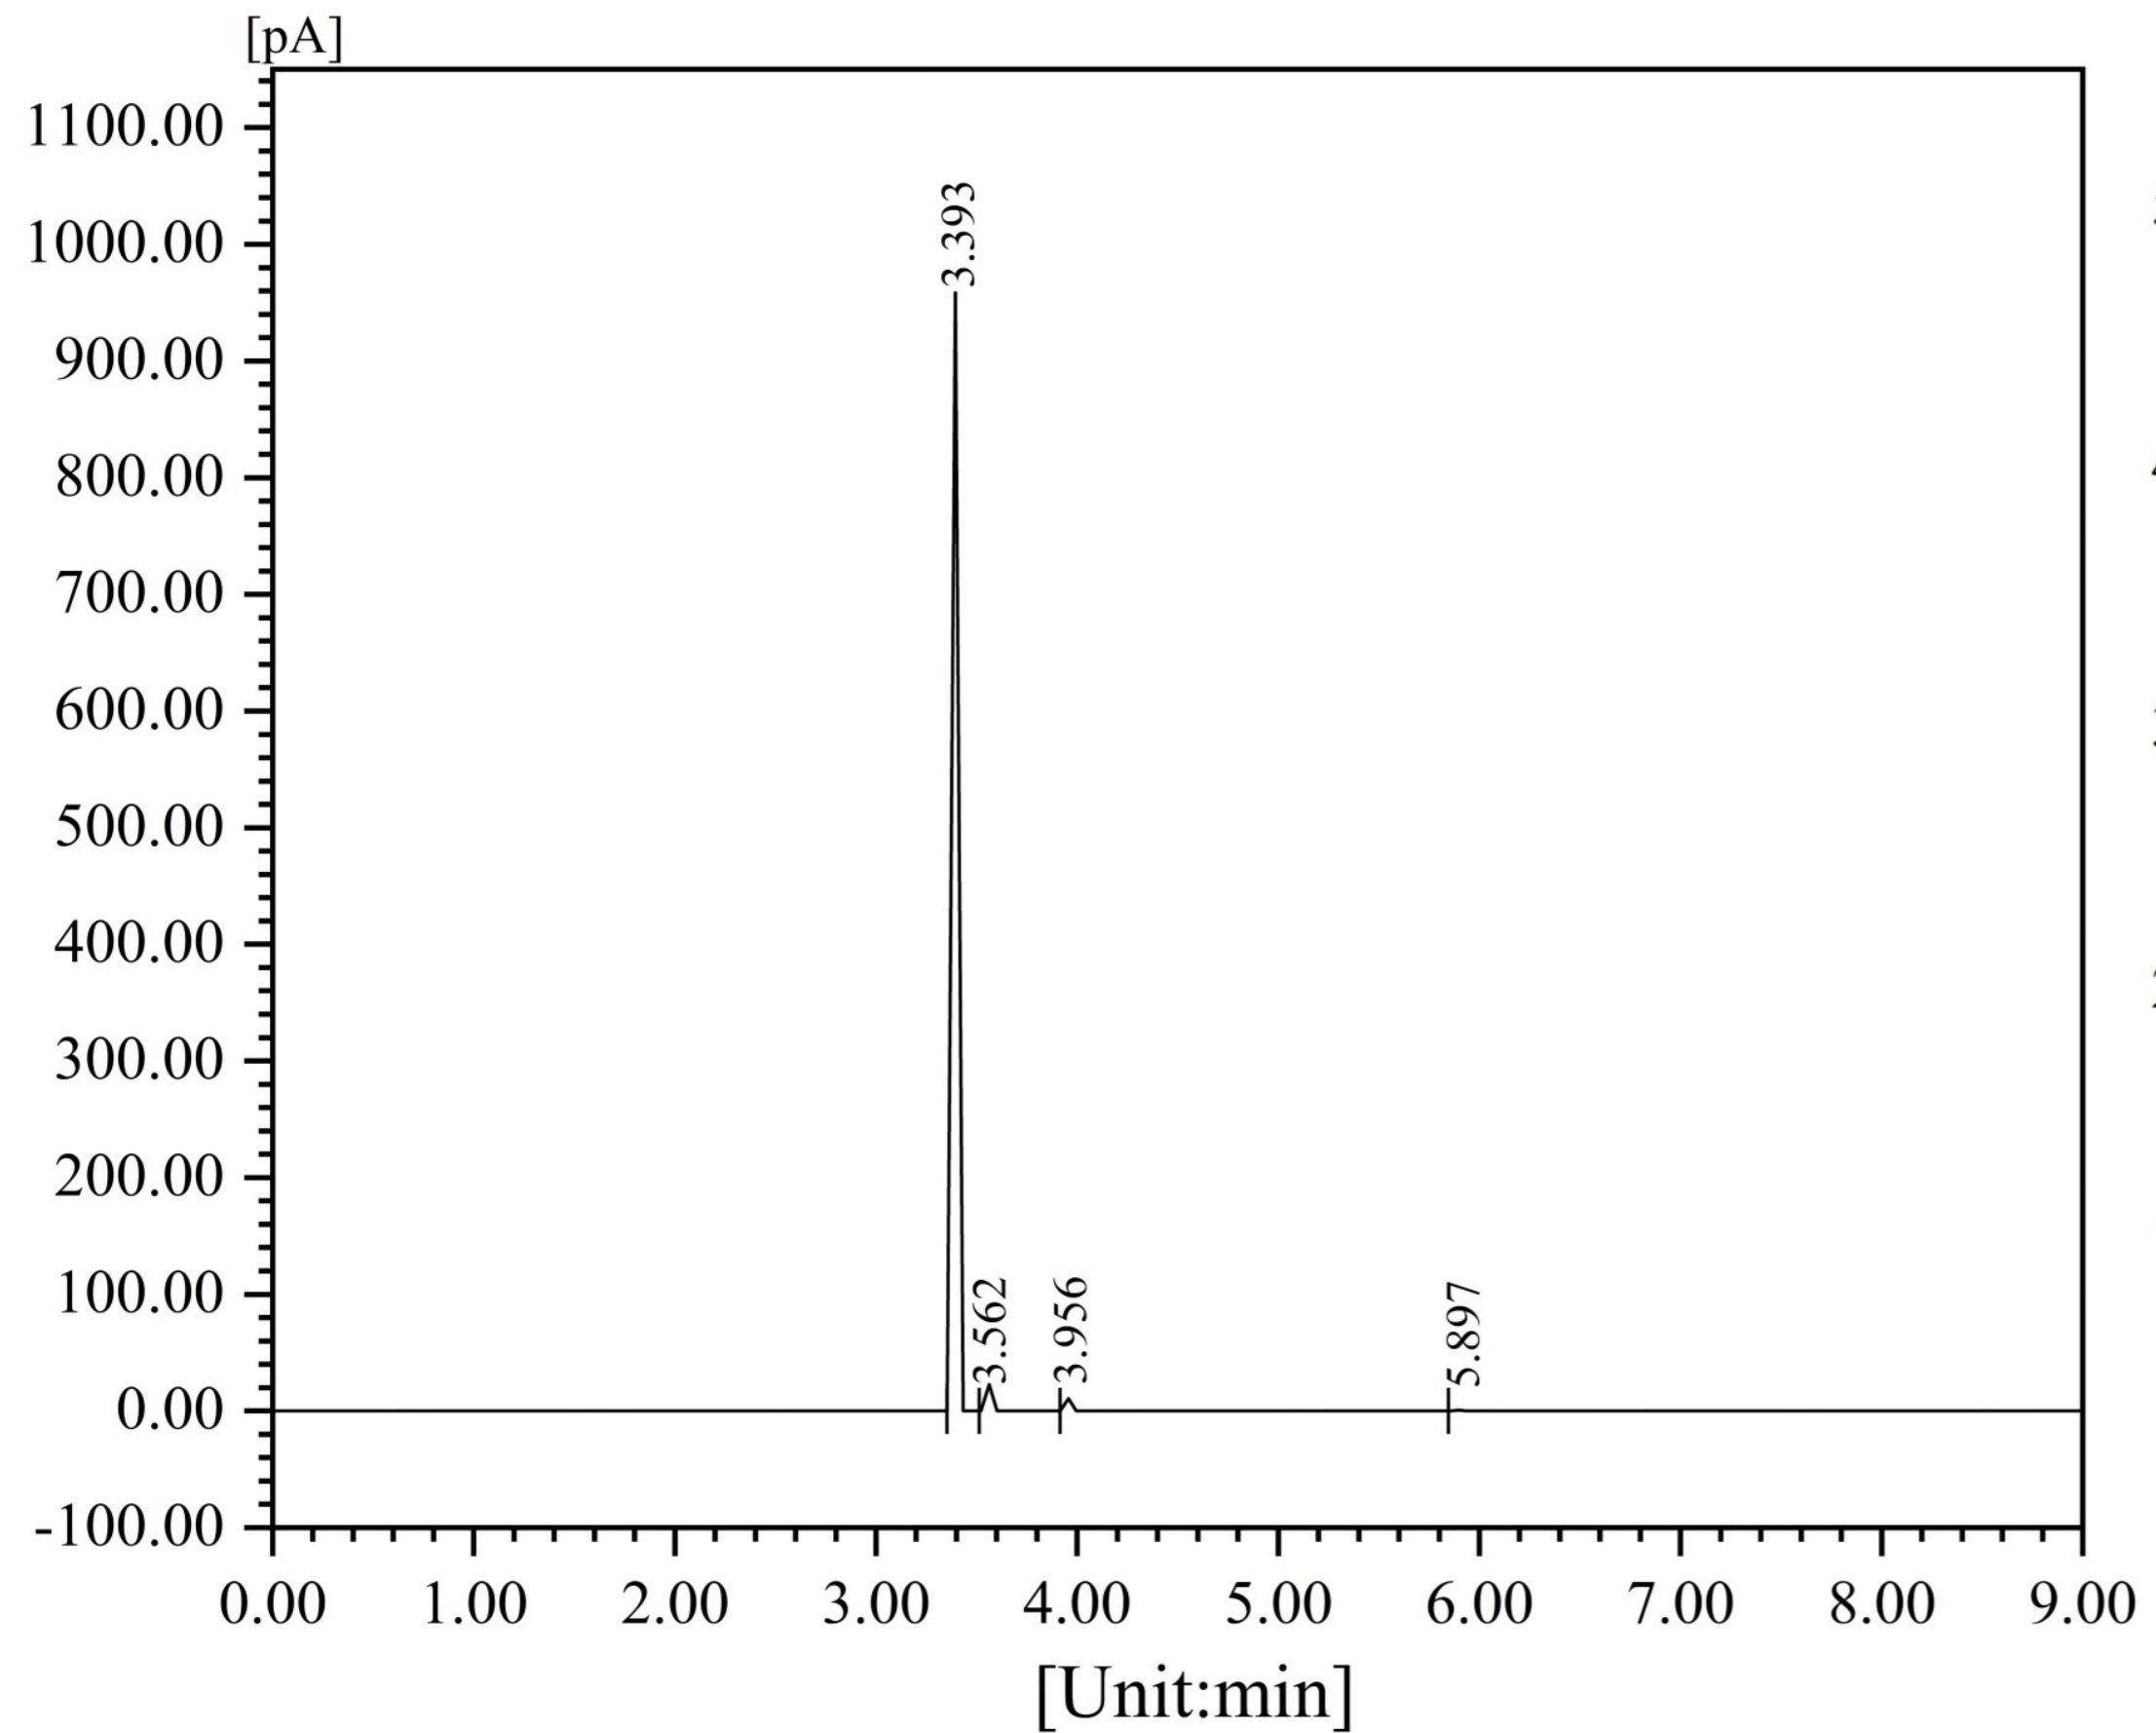

**b**

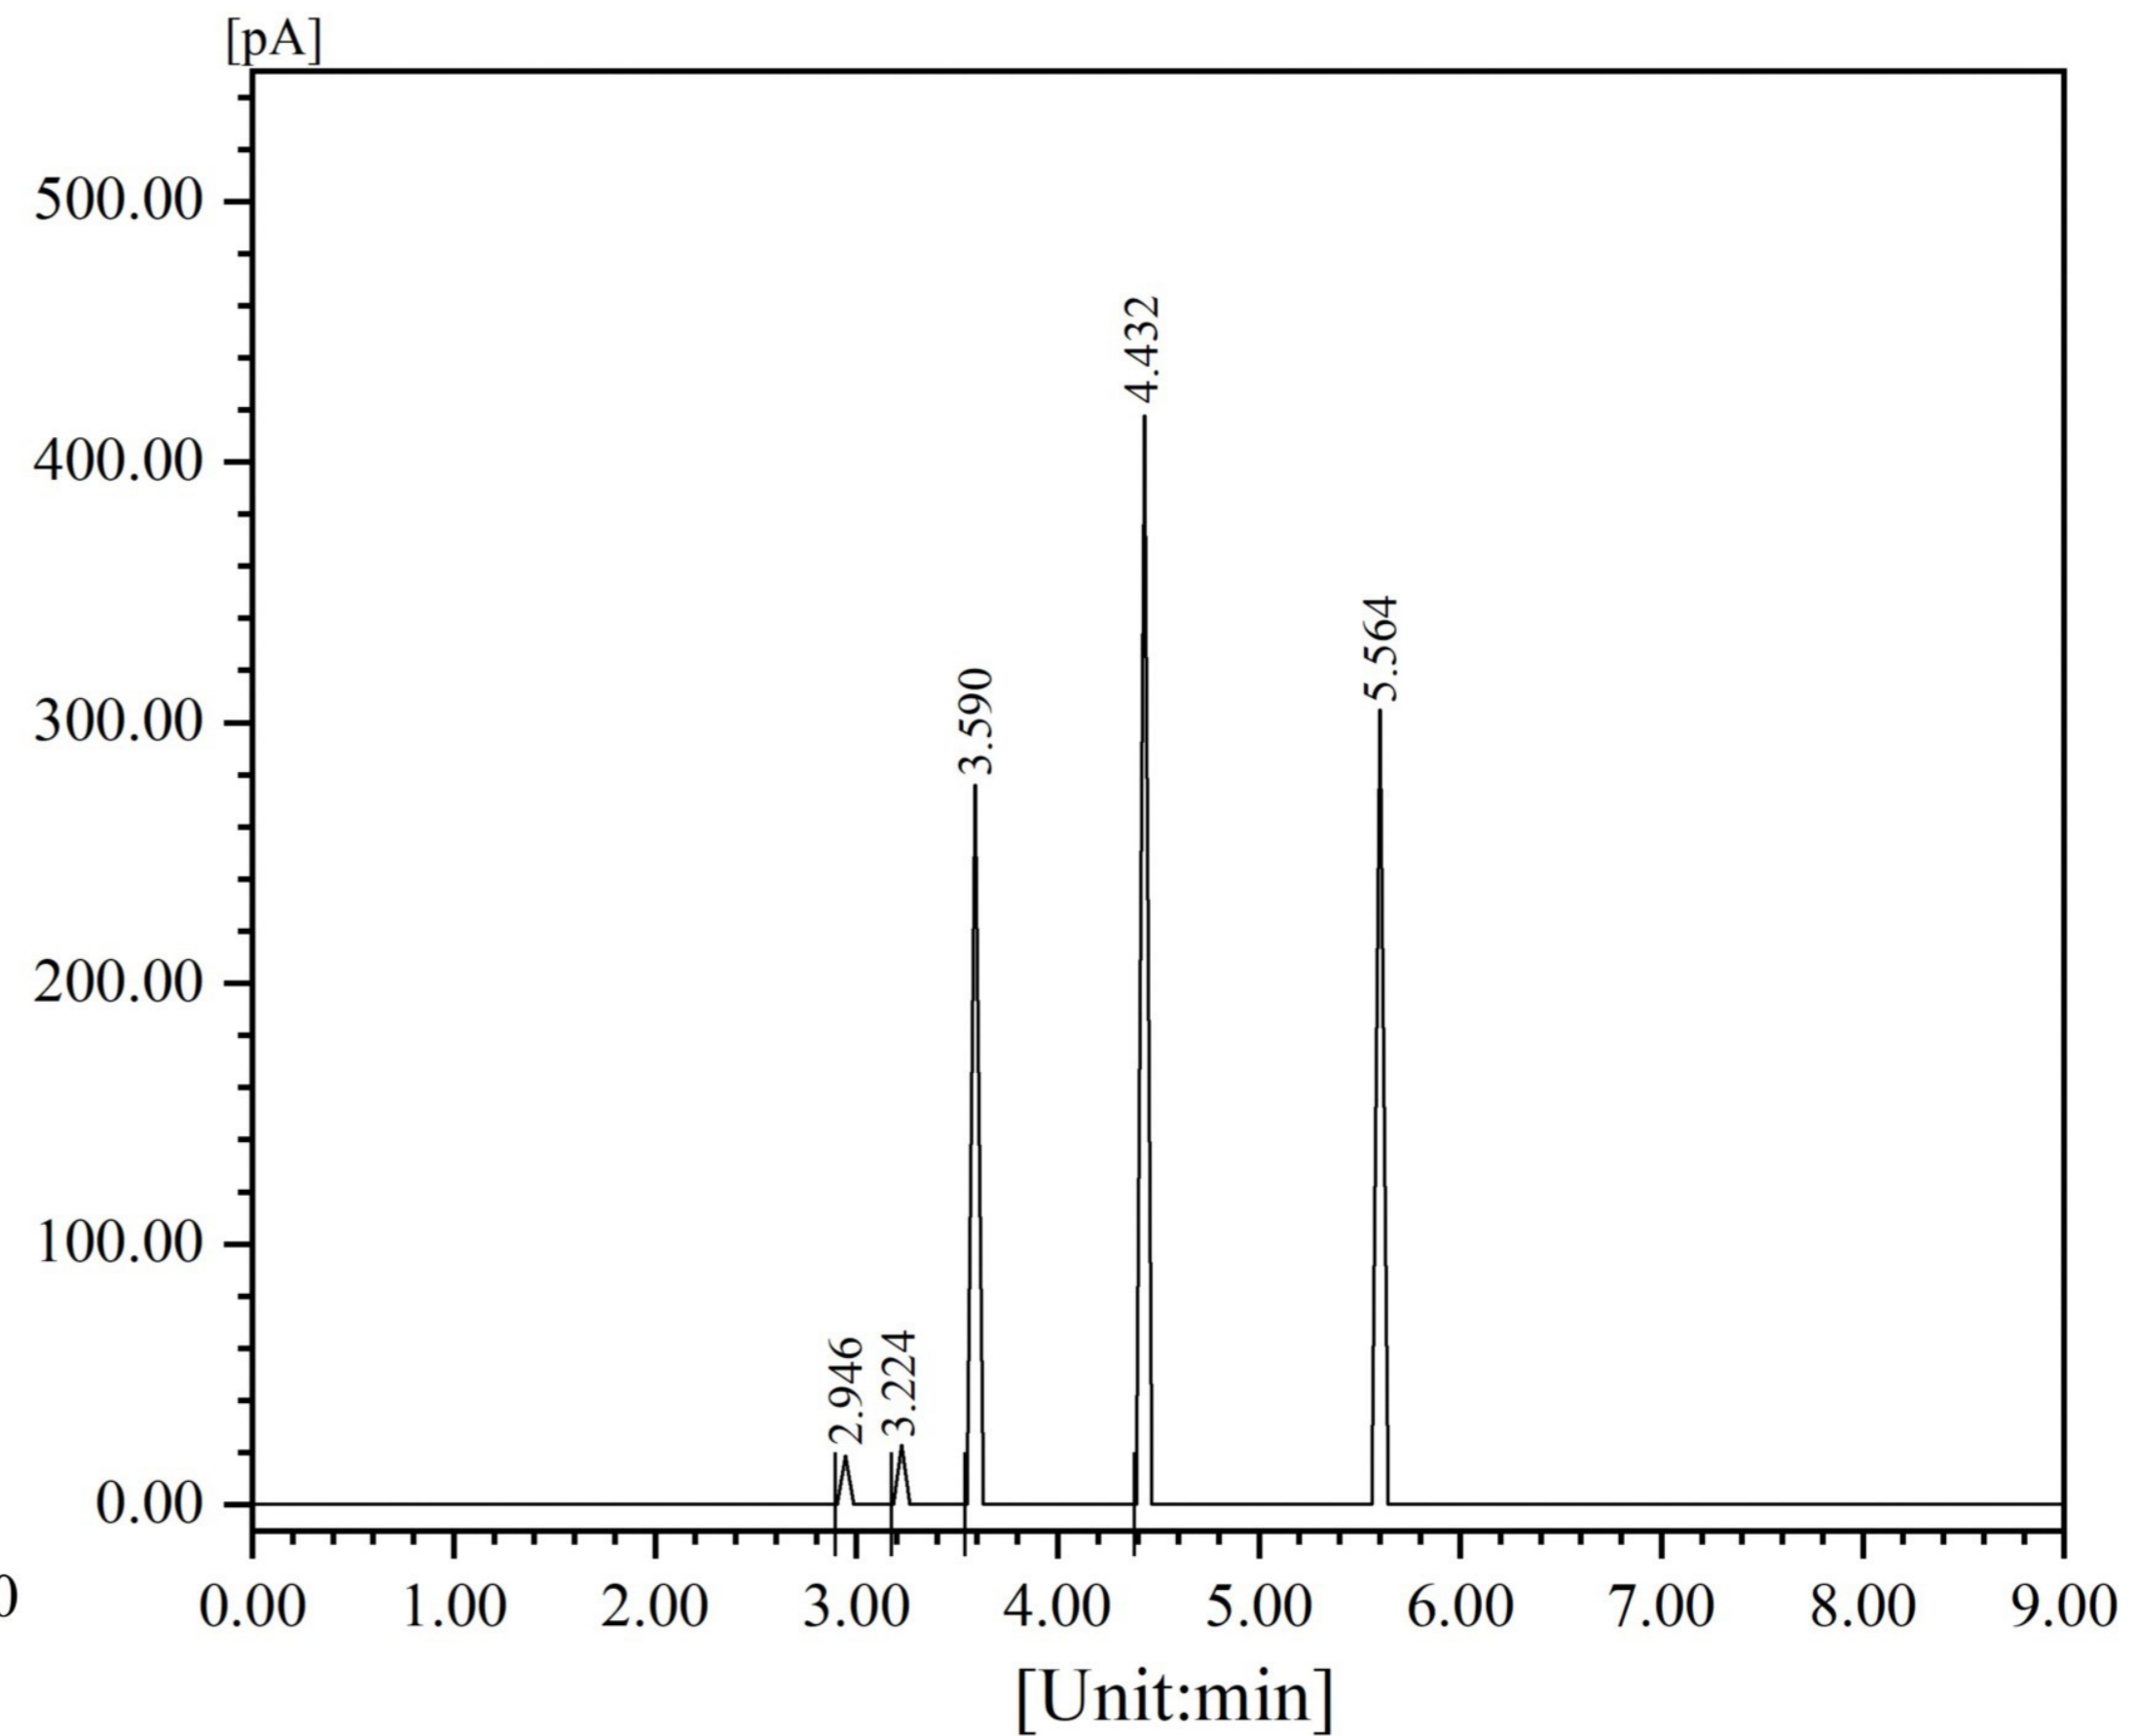

Supplement: d6se00122j12.pdf [file d6se00122j12.pdf]

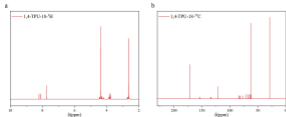

Supplement: d6se00122j2.pdf [file d6se00122j2.pdf]

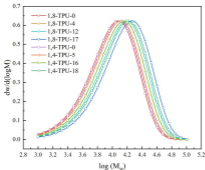

Supplement: d6se00122j3.pdf [file d6se00122j3.pdf]

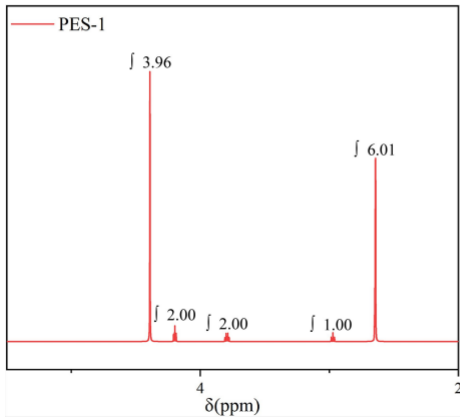

Supplement: d6se00122j5.pdf [file d6se00122j5.pdf]

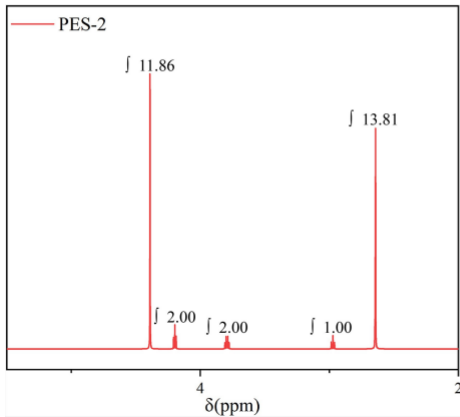

Supplement: d6se00122j6.pdf [file d6se00122j6.pdf]

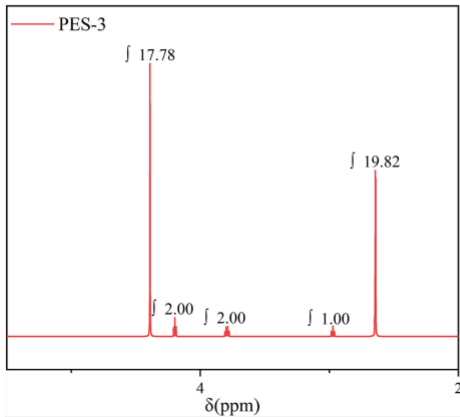

Supplement: d6se00122j7.pdf [file d6se00122j7.pdf]

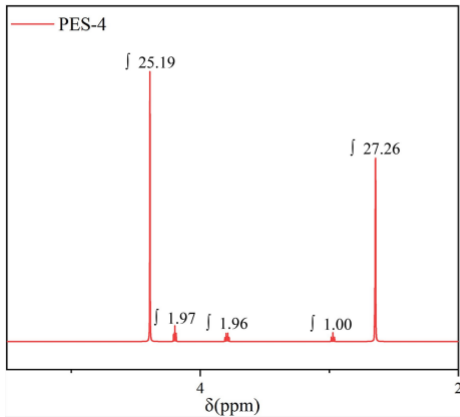

Supplement: d6se00122j8.pdf [file d6se00122j8.pdf]
